# Supplementary material for: Digitized Construction of Iontronic Pressure Sensor with Self-Defined Configuration and Widely Regulated Performance
Source: Sensors (Basel). 2022 Aug 16;22(16):6136. doi: 10.3390/s22166136 (PMC9415562; doi:10.3390/s22166136)
Supplement: Supplementary file 1 [file sensors-22-06136-s001.zip › sensors-1877164-supplementary.pdf]

# **Digitized Construction of Iontronic Pressure Sensor with Self-Defined Configuration and Widely-Regulated Performance**

Honghao Wang<sup>1#</sup>, Chun Liang<sup>1#</sup>, Haozhe Zhang<sup>1</sup>, Yan Diao<sup>1</sup>, Hua Luo<sup>1\*</sup>, Yangyang Han<sup>2</sup>, and Xiaodong Wu<sup>1\*</sup>

*<sup>1</sup>School of Mechanical Engineering, Sichuan University, Chengdu 610065, China*

*<sup>2</sup> State Key Laboratory of Polymer Materials Engineering, Sichuan University, Chengdu 610065, China*

*<sup>#</sup>These authors contributed equally to this work.*

*\*E-mail: luohua@scu.edu.cn; xiaodong\_wu@scu.edu.cn*

**Table S1.** Comparison of the characteristics and the sensitivity of our pressure sensors with other reported pressure sensors in literature.

| No. | Characteristic                                           | Sensitivity /kPa <sup>-1</sup> | Ref.                                                |
|-----|----------------------------------------------------------|--------------------------------|-----------------------------------------------------|
| 1   | bioinspired hierarchical structure                       | 8.5                            | <i>Adv. Mater.</i> <b>2016</b> , 28, 5300           |
| 2   | surface-wrinkled pyramidal microstructure                | 0.7                            | <i>Adv. Mater.</i> <b>2018</b> , 30, 1803388        |
| 3   | biomimetic hierarchical structures                       | 19.8                           | <i>Adv. Funct. Mater.</i> <b>2017</b> , 27, 1606066 |
| 4   | 3D graphene–poly(dimethylsiloxane) (GP) hollow structure | 15.9                           | <i>Adv. Mater.</i> <b>2017</b> , 29, 1702675        |
| 5   | bionic spinosum microstructure.                          | 25.1                           | <i>ACS Nano</i> <b>2018</b> , 12, 2346              |
| 6   | Silk-Molded structure                                    | 1.8                            | <i>Adv. Mater.</i> <b>2014</b> , 26, 1336           |
| 7   | Interlocked microdome struture                           | 15.1                           | <i>ACS Nano</i> <b>2014</b> , 8, 4689               |
| 8   | ordered microstructures                                  | 5.5                            | <i>Small</i> <b>2014</b> , 10, 3625                 |
| 9   | Digitally fabricated pressure sensors                    | 58                             | <b><i>This work</i></b>                             |

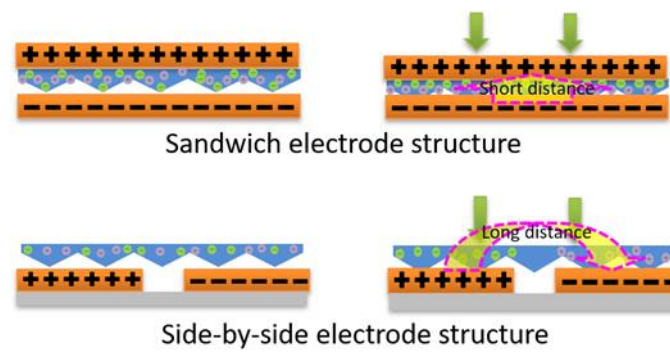

**Figure S1.** Schematics showing the structural variations of the sandwich electrode configuration and the side-by-side electrode configuration under externally applied pressure.

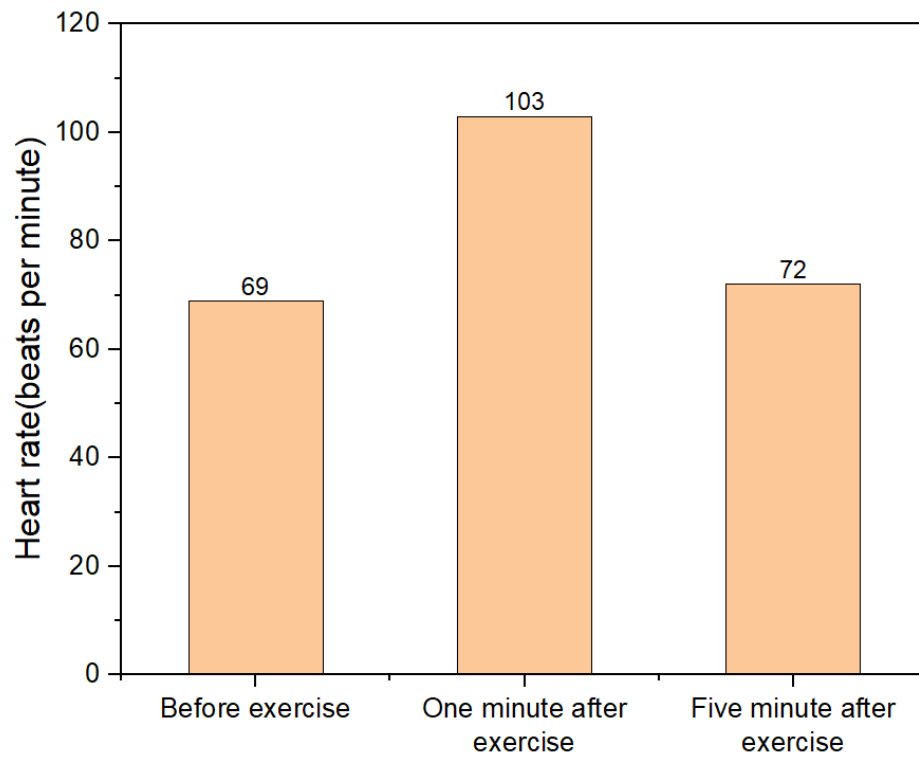

**Figure S2.** The extracted heart rates from the original pulse signals at different physiological statuses, including before exercise, one minute after exercise, and five minutes after exercise.

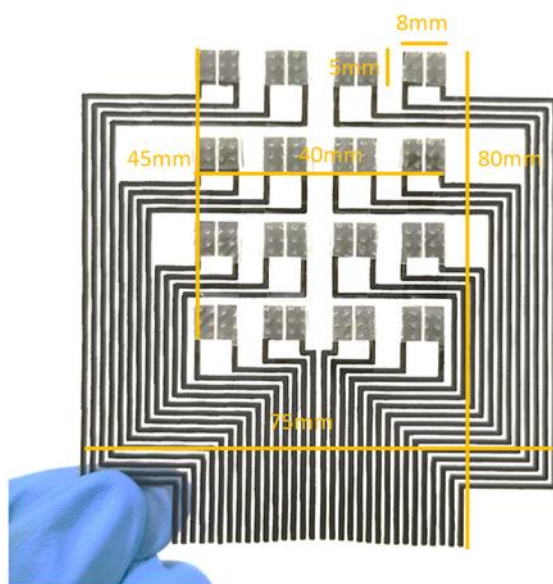

**Figure S3.** Digital picture showing the electronic skin with 16 sensors, along with the size information.
